# Supplementary material
Source: PubMed Central journal article supplement (PMC1820653)
Supplement: pnas_0607187104_1.pdf [file pnas_0607187104_1.pdf]

**Table 2. Autosomal STR profiles and Amelogenin gene typings of the 10 individuals studied**

| Sample  | PCRs,<br>no. | Extractions,<br>no. | Bone<br>/Tooth<br>samples,<br>no. | <i>AMEL</i> | D3S1358 | D8S1179 | D5S818 | vWA     | D21S11  | D13S317 | FGA   | D7S820 | D18S51 |
|---------|--------------|---------------------|-----------------------------------|-------------|---------|---------|--------|---------|---------|---------|-------|--------|--------|
| SZA23 1 | 6            | 2                   | 2                                 | X/Y         | 14      | 13/14   | 11     | 14/16   | 26/29.2 | 11/13   | 22/23 | 7/8    | -      |
| SZA23 2 | 8            | 2                   | 2                                 | X           | 15/17   | 12      | 11     | 19      | -       | -       | -     | -      | -      |
| SZA23 3 | 6            | 2                   | 2                                 | X/Y         | 15/17   | 13/14   | 12/13  | 14/17   | 28/29   | -       | -     | -      | -      |
| ELT 2   | 2            | 2                   | 2                                 | X/Y         | 15/16   | 12/17   | 12     | 14/(17) | 30/31   | 8/9     | 24    | -      | -      |
| DR2     | 8            | 3                   | 2                                 | X/Y         | 15/17   | 13/15   | 11     | 18/19   | 30/31   | -       | -     | -      | -      |
| DEB 1   | 6            | 2                   | 1                                 | X           | -       | -       | -      | 14      | -       | -       | -     | -      | -      |
| DEB 3   | 7            | 3                   | 2                                 | X           | 18      | 11/13   | 12     | -       | -       | -       | -     | -      | -      |
| DEB 4   | 6            | 3                   | 2                                 | X/Y         | 18/19   | 13/14   | 11/13  | 16/17   | -       | 9       | -     | -      | -      |
| KRE 1   | 9            | 4                   | 2                                 | X           | 16/17   | 11/15   | 12     | 16      | 28/29   | -       | -     | -      | -      |
| KRE 2   | 7            | 3                   | 2                                 | X/Y         | 15/17   | 9/14    | 11/12  | 16      | 28      | -       | -     | -      | -      |

Consensus alleles were established if genotypes were reproduced in at least three amplifications. *AMEL*, amelogenin gene. Dashes indicate cases with fewer than three successful reproducible typings.
