# Supplementary material
Source: PubMed Central journal article supplement (PMC1820653)
Supplement: pnas_0607187104_2.pdf [file pnas_0607187104_2.pdf]

**Table 3. Location of origin, anatomic description, and sample code for bone and tooth material**

| Sample   | Material            | Location                                                                        |
|----------|---------------------|---------------------------------------------------------------------------------|
| DEB 1    | M 37                | Eastern Germany, northern Harz region,                                          |
| DEB 3a   | M 26                | Derenburg Meerenstieg II, and Neolithic                                         |
| DEB 3b   | M 37                | cemetery                                                                        |
| DEB 4a   | M 28                |                                                                                 |
| DEB 4b   | M 18                |                                                                                 |
| DR 2a    | M                   | Northeastern Poland, Suwalki region,                                            |
| DR 2b    | M                   | Drestwo, burial 2                                                               |
| ELT 2    | Femur (left)        | Southwestern Germany, Hesse, Eltville,<br>Merovingian burial ground, burial 382 |
| KRE 1a   | M 37, M 38, P<br>45 | Northeastern Lithuania, Kretuonas, burial<br>site Kretuonas 1B, burials 1 and 3 |
| KRE 1b   | Femur (left)        |                                                                                 |
| KRE 2a   | I 41, I 42, C 43    |                                                                                 |
| KRE 2b   | P 34                |                                                                                 |
| SZA23.1a | M 36                | Southeastern Hungary, Great Hungarian                                           |
| SZA23.1b | M 46                | Plain, District of Békés, Szarvas, burials 4,                                   |
| SZA23.2a | M                   | 20, and 26                                                                      |
| SZA23.2b | Femur               |                                                                                 |
| SZA23.3a | P                   |                                                                                 |
| SZA23.3b | P                   |                                                                                 |

I, incisor; C, canine; M, molar; P, premolar.
