# Supplementary material
Source: PubMed Central journal article supplement (PMC1820653)
Supplement: pnas_0607187104_3.pdf [file pnas_0607187104_3.pdf]

**Table 4. Coworker ID, lactase genotype, and mtDNA haplotype**

| Coworker ID | <i>MCM6</i> genotype |          | mtDNA 16209-16303          |
|-------------|----------------------|----------|----------------------------|
|             | Intron 13            | Intron 9 |                            |
| B.B.        | C                    | G        | T224C                      |
| C.W.        | C                    | G        | T224C, C245T               |
| U.A.        | Y                    | R        | CRS                        |
| J.B.        | Y                    | A        | T298C                      |
| M.K.        | Y                    | R        | C270T                      |
| G.B.        | C                    | G        | T263C                      |
| A.S.        | T                    | A        | CRS                        |
| W.H.        | C                    | G        | CRS                        |
| M.T.        | Y                    | R        | C223T                      |
| R.B.        | T                    | A        | C294T                      |
| S.M.R.      | Y                    | R        | CRS                        |
| F.S.        | T                    | A        | C270T                      |
| P.C.        | C                    | G        | C261T, A284G, C290T        |
| Lithuania J | C                    | G        | C257T                      |
| Lithuania C | Y                    | R        | CRS                        |
| Hungary Z   | T                    | A        | CRS                        |
| Hungary I   | Y                    | R        | CRS                        |
| Russia      | C                    | G        | T224C                      |
| Halle 1     | Nd                   | Nd       | C294T, C296T               |
| Halle 2     | Nd                   | Nd       | C223T                      |
| Halle 3     | Nd                   | Nd       | A235G, C261T, C291T, A293G |
| Halle 4     | Nd                   | Nd       | C291T                      |

Shown are the genotypes of the main archaeologists and anthropologists who handled the samples and of the lab workers who were present in the lab when the samples were processed. Only bases that differ from the Cambridge reference sequence (Table 1) are shown for mtDNA-haplotypes. Nd, not determined.
