# Supplementary material
Source: PubMed Central journal article supplement (PMC1820653)
Supplement: pnas_0607187104_4.pdf [file pnas_0607187104_4.pdf]

**Table 5. Sequences, location, product length, and annealing temperature for primers**

| Primer    | Location, nucleotide position | Sequence, 5'-3'                                       | Product length, bp | Annealing temp., °C |
|-----------|-------------------------------|-------------------------------------------------------|--------------------|---------------------|
| lac5u     | <i>MCM6</i> 26609-26719       | GCGCTGGCAATACAGATAAGATA                               | 111                | 53                  |
| lac5l     |                               | AATGCAGGGCTCAAAGAACAA                                 |                    |                     |
| lac6u     | <i>MCM6</i> 18440-18554       | AGTCAGAATACCCCTACCCTATCA                              | 115                | 53                  |
| lac6l     |                               | AAAGTACTGGGACAAAGGTGTGAG                              |                    |                     |
| lac7_mini | <i>MCM6</i> 26604-26637       | CCTCTGCGCTGGCAATACAGATAAGATAATGTAG                    | 35                 | 55                  |
| lac8_mini | <i>MCM6</i> 18475-18523       | TAAGTTACCATTAAAAAGATGTCCTTAAAAACAG<br>CATTCTCAGCTGGGC | 50                 | 55                  |
| L16209    | HVS I                         | CCCCATGCTTACAAGCAAGT                                  | 94                 | 53                  |
| H16303    |                               | TGGCTTTATGTACTATGTAC                                  |                    |                     |
